# Supplementary material for: High levels of PF4, VEGF-A, and classical monocytes correlate with the platelets count and inflammation during active tuberculosis
Source: PubMed Central journal article supplement (PMC9618821; doi:10.3389/fimmu.2022.1016472), 2022-10-17
Supplement: DataSheet_1.pdf [file DataSheet_1.pdf]

## *Supplementary Material*

### **High levels of PF4, VEGF-A, and classical monocytes correlate with the platelets count and inflammation during active tuberculosis**

**Alexia Urbán-Solano<sup>1</sup>, Julio Flores-González<sup>1</sup>, Alfredo Cruz-Lagunas<sup>2</sup>, Gloria Pérez-Rubio<sup>3</sup>, Ivette Buendia-Roldan<sup>4</sup>, Lucero A. Ramón-Luing<sup>1</sup> and Leslie Chavez-Galan<sup>1\*</sup>**

<sup>1</sup>Laboratory of Integrative Immunology, Instituto Nacional de Enfermedades Respiratorias Ismael Cosío Villegas, Mexico City, Mexico

<sup>2</sup>Laboratory of Immunobiology and Genetic, Instituto Nacional de Enfermedades Respiratorias Ismael Cosío Villegas, Mexico City, Mexico

<sup>3</sup> HLA Laboratory, Instituto Nacional de Enfermedades Respiratorias Ismael Cosío Villegas, Mexico City, Mexico

<sup>4</sup> Translational Research Laboratory on Aging and Pulmonary Fibrosis, Instituto Nacional de Enfermedades Respiratorias Ismael Cosío Villegas, Mexico City, Mexico

**\* Correspondence:**

Leslie Chávez-Galán

[lchavezgalan@gmail.com](mailto:lchavezgalan@gmail.com); [lchavez\\_galan@iner.gob.mx](mailto:lchavez_galan@iner.gob.mx)

## Figures

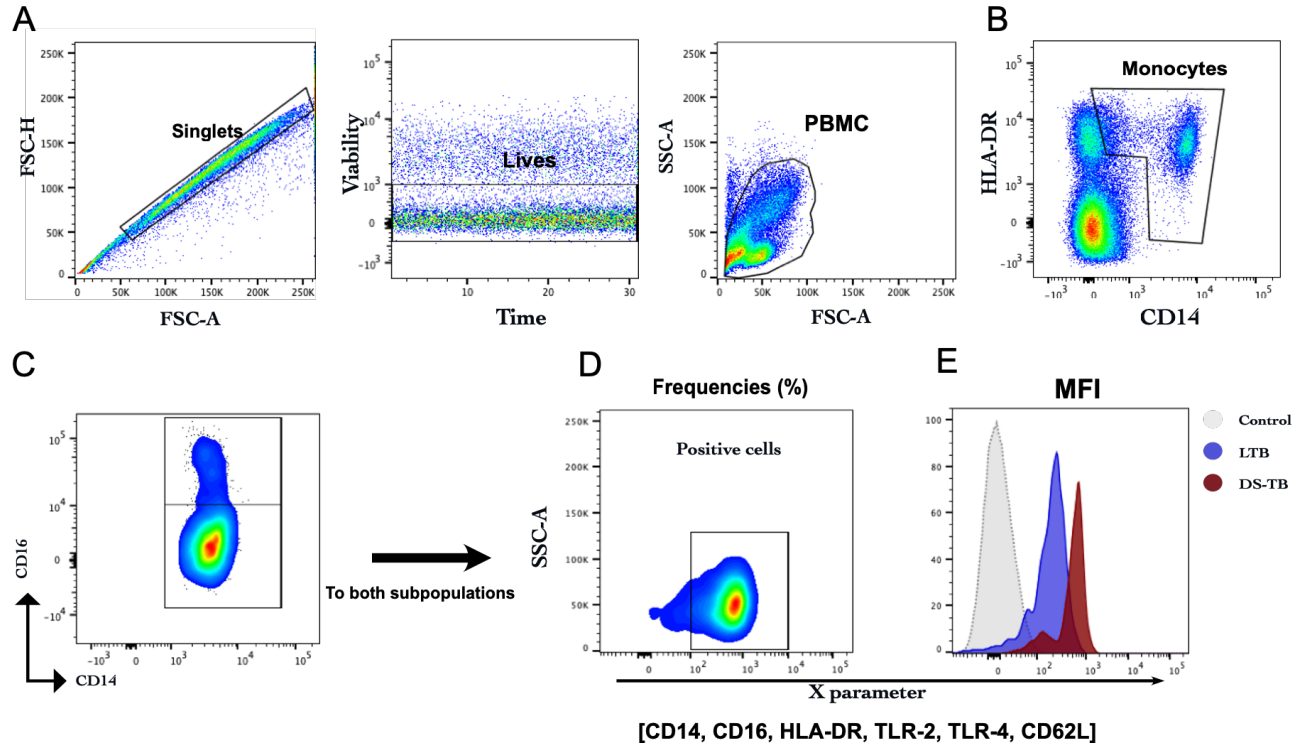

**Figure S1. Gating strategies for flow cytometrical analysis.** Representative example of the results obtained in cell subpopulation monocytes subsets from peripheral blood analysis (5,000 threshold): singlets cells (**A**) were identified through forward scatter (FSC-A versus FSC-H). Then, viable cells were selected, followed by forward scatter (FSC) and side scatter (SSC) dot plot to selected live monocytes based on HLA-DR and CD14 expression (**B**). Two subpopulations of monocytes were identified based on CD14 and CD16 expression as Classical (CD14<sup>+</sup>) and Non-classical (CD14<sup>+</sup>CD16<sup>+</sup>) (**C**). The frequency (**D**) and mean fluorescent intensity (MFI) (**E**) of indicated molecules were calculated. All MFI analyzed included a latent (blue), active (red) tuberculosis patients and a negative control (gray).

## Classical

## Non-classical

**A**

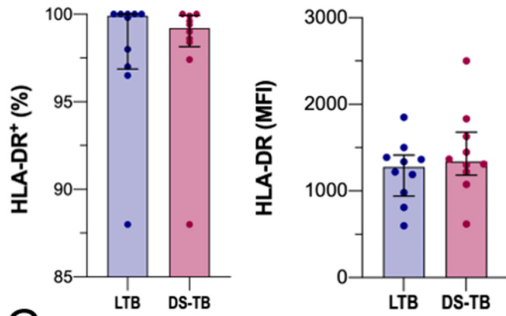

**B**

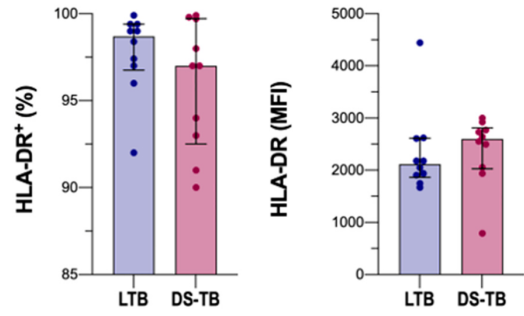

**C**

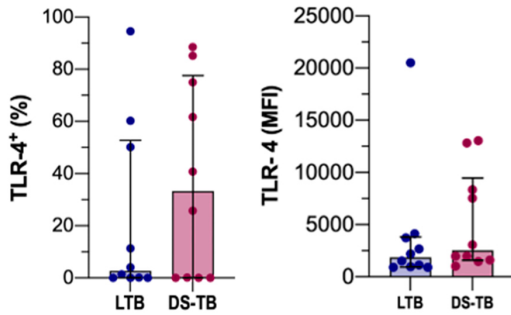

**D**

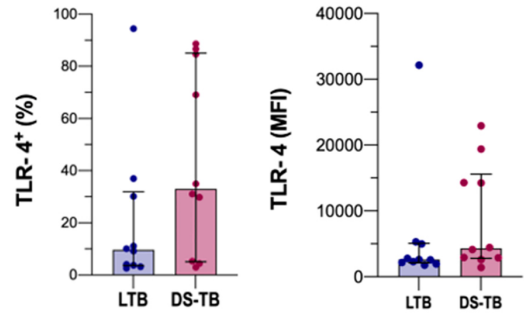

**E**

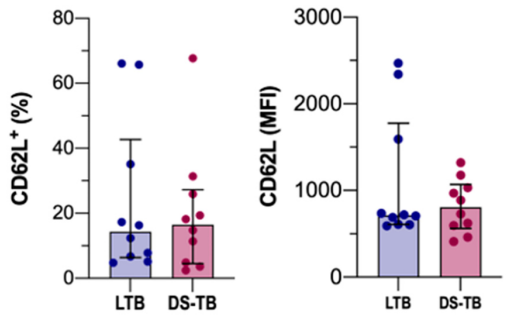

**F**

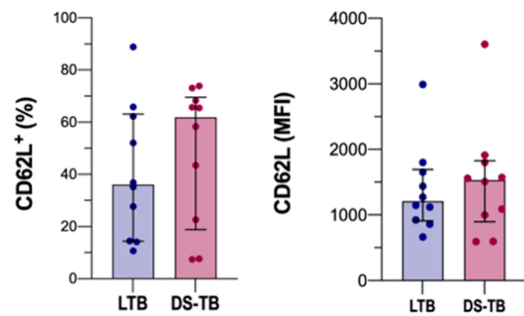

**Figure S2. Frequency of subsets monocytes cells.** Frequency and mean fluorescent intensity (MFI) of total monocytes cells in latent (LTB) and active (DS-TB) TB patients according to HLA-DR (**A, B**), TLR-4 (**C, D**) and CD62L (**E, F**) on classical (**A, C** and **E**) and non-classical (**B, D** and **F**) monocytes subsets. Data are shown as median with interquartile range (IQR, 25–75). The statistical comparison was performed using Mann-Whitney U Test.

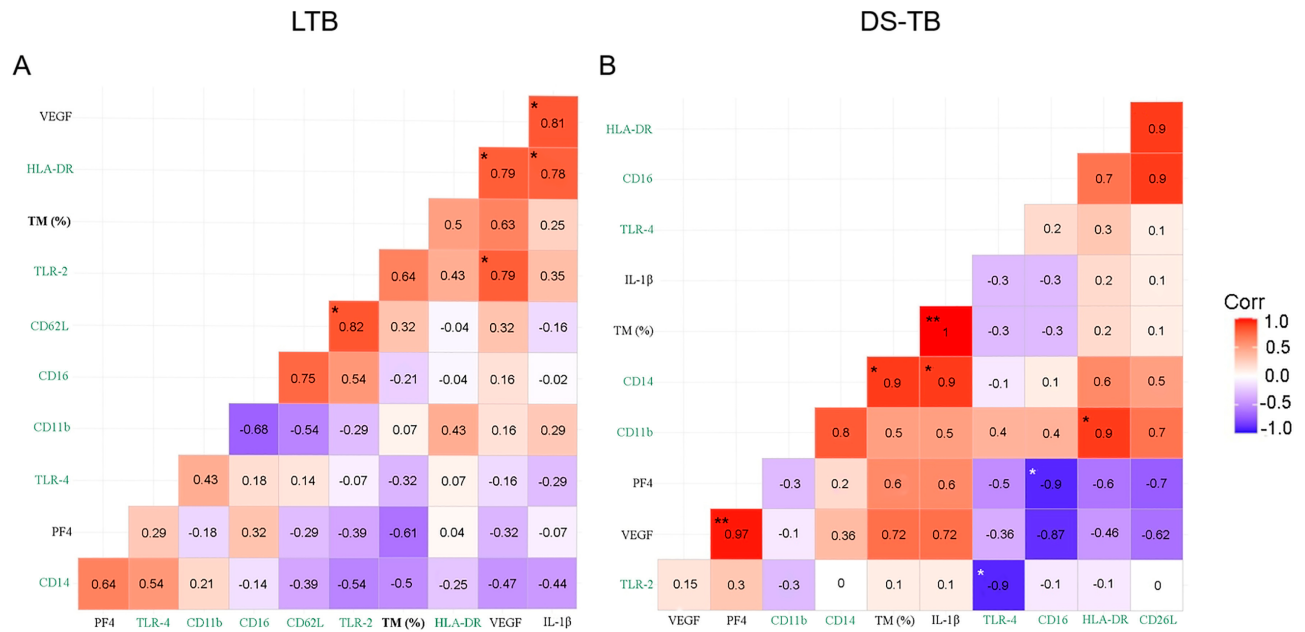

**Figure S3. Correlation between Total monocytes (TM) and plasmatic levels of soluble molecules in latent (A) and active (B) TB patients.** Correlations are presented with the value of Spearman's Rho in the corresponding box. Significant correlations are represented with asterisks (\*  $p < 0.05$ , \*\*  $p < 0.01$ ). The red color indicates a strong positive correlation and the blue color indicates a strong negative correlation. Green labels are mean fluorescent intensity values.

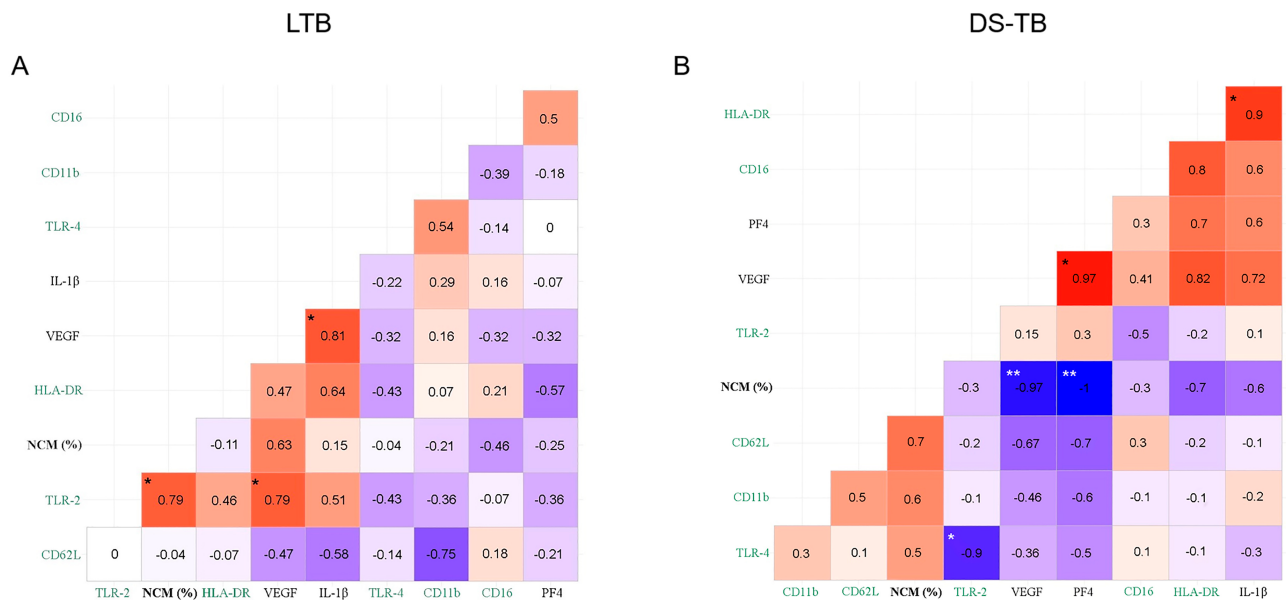

**Figure S4. Correlation between non-classical monocytes (NCM) and plasmatic levels of soluble molecules in latent (A) and active (B) TB patients.** Correlations are presented with the value of Spearman's Rho in the corresponding box. Significant correlations are represented with asterisks (\*  $p < 0.05$ , \*\*  $p < 0.01$ ).

< 0.05, \*\*p < 0.01). The red color indicates a strong positive correlation and the blue color indicates a strong negative correlation. Green labels are mean fluorescent intensity values.

## Tables

**Table S1.** Antibodies used for flow cytometry, ELISA and Bio-Plex.

| Molecule/Product | Conjugate to    | Clone           | Catalog    | Company                 |
|------------------|-----------------|-----------------|------------|-------------------------|
| CD16             | PE-Cy7          | 3G8             | 302016     | Biolegend               |
| CD11b            | PerCP-Cy5.5     | ICRF44          | 301328     | Biolegend               |
| CD284            | PE              | HTA125          | 312806     | Biolegend               |
| CD282            | FITC            | TL2.1           | 309706     | Biolegend               |
| HLA-DR           | APC-Cy7         | L243            | 307617     | Biolegend               |
| CD14             | BV510           | 63D3            | 367123     | Biolegend               |
| CD62L            | BV421           | DREG-56         | 304828     | Biolegend               |
| Viability        | PE TexRed       | NA <sup>‡</sup> | 423109     | Biolegend               |
| CXCL4/PF4        | NA <sup>‡</sup> | NA <sup>‡</sup> | DPF40      | R&D System              |
| MCP-1            | NA <sup>‡</sup> | NA <sup>‡</sup> | 438804     | BioLegend               |
| IL-17A           | NA <sup>‡</sup> | NA <sup>‡</sup> | 433914     | Biolegend               |
| MUC5B            | NA <sup>‡</sup> | NA <sup>‡</sup> | MBS2024599 | MyBioSource             |
| IL-6             | NA <sup>‡</sup> | NA <sup>‡</sup> | 171B0006M  | Bio-Rad<br>Laboratories |
| IP-10            | NA <sup>‡</sup> | NA <sup>‡</sup> | 171B5020M  | Bio-Rad<br>Laboratories |
| VEGF-A           | NA <sup>‡</sup> | NA <sup>‡</sup> | 171B5027M  | Bio-Rad<br>Laboratories |

|                                              |                 |                 |             |                         |
|----------------------------------------------|-----------------|-----------------|-------------|-------------------------|
| PDGF-AB                                      | NA <sup>‡</sup> | NA <sup>‡</sup> | 171B5024M   | Bio-Rad<br>Laboratories |
| Reagent Kit III<br>with Flat<br>Bottom Plate | NA <sup>‡</sup> | NA <sup>‡</sup> | 171-304090M | Bio-Rad<br>Laboratories |
| Human<br>Cytokine<br>Standards               | NA <sup>‡</sup> | NA <sup>‡</sup> | 171D50001   | Bio-Rad<br>Laboratories |

<sup>‡</sup>NA, not applicable.

**Table S2.** Comparison of parameters evaluated with the healthy donors group.

| Biomolecule        | HD                         | LTB                        | DS-TB                      | <i>p</i> value HD<br>vs LTB | <i>p</i> value HD<br>vs DS-TB |
|--------------------|----------------------------|----------------------------|----------------------------|-----------------------------|-------------------------------|
| PF4 (ng/mL)        | 2250 (1929-<br>2816)       | 2012 (1213-<br>2727)       | 3108 (2578-<br>3750)       | ns                          | ns                            |
| PDGF-BB<br>(pg/mL) | 420.2<br>(30.81-<br>635.9) | 65.98<br>(28.46-<br>199.1) | 186 (19.39-<br>257.9)      | ns                          | ns                            |
| VEGF-A<br>(pg/mL)  | 0 (0-0)                    | 0 (0-0.55)                 | 9.64 (0-<br>22.69)         | ns                          | 0.0009                        |
| MCP-1<br>(pg/mL)   | 79.11<br>(61.22-<br>94.48) | 99.04<br>(88.15-<br>118.3) | 91.16<br>(71.91-<br>123.0) | ns                          | ns                            |
| IL-6 (pg/mL)       | 0.22 (0-                   | 0.73<br>(0.4425-           | 14.78<br>(4.428-           | ns                          | 0.0002                        |

|                         |                            |                       |                         |    |         |
|-------------------------|----------------------------|-----------------------|-------------------------|----|---------|
|                         | 1.275)                     | 1.0)                  | 31.60)                  |    |         |
| IL-1 $\beta$<br>(pg/mL) | 0 (0-0)                    | 0.035 (0-<br>0.1425)  | 0.465 (0.33-<br>0.7625) | ns | <0.0001 |
| IP-10<br>(pg/mL)        | 118.3<br>(103.7-<br>332.7) | 282 (161.7-<br>473.6) | 2718 (1033-<br>5658)    | ns | 0.0003  |

Data are shown as median with interquartile range (IQR, 25–75). The statistical comparison was performed using Mann-Whitney U Test. HD: healthy donor, LTB: latent tuberculosis, DS-TB: drug-sensitive tuberculosis, PF4: platelet factor-4, PDGF-BB: platelet-derived growing factor, VEGF-A: vascular endothelial growing factor, MCP-1: monocyte chemoattractant protein-1, IL-6: interleukin-6, IL-1b: interleukin-1 beta, IP-10: Interferon- $\gamma$  inducible protein 10, ns: not significant.
